# Supplementary material for: Management and Molecular Characterization of Intraventricular Glioblastoma: A Single-Institution Case Series
Source: MDPI journal article supplement (doi:10.3390/ijms241713285), 2023-08-27
Supplement: s1 [file s1]

**Supplemental Table S1. Genes covered by the Johns Hopkins Genomics Molecular Diagnostics Laboratory clinical solid tumor panel**

|          |        |        |           |           |         |          |          |           |
|----------|--------|--------|-----------|-----------|---------|----------|----------|-----------|
| ABL1     | BTK    | CYLD   | FGF23     | HIST1H2BJ | LRRK2   | NPM1     | RAD21    | STAT4     |
| ABL2     | BTLA   | DAXX   | FGF3      | HIST1H2BK | MAF     | NRAS     | RAD50    | STAT5A    |
| ACTB     | CAD    | DDR2   | FGF4      | HIST1H2BO | MAFB    | NSD1     | RAD51    | STAT5B    |
| ACVR1B   | CALR   | DDX3X  | FGF6      | HIST1H3B  | MAGED1  | NT5C2    | RAF1     | STAT6     |
| AKT1     | CARD11 | DEK    | FGFR1     | HNF1A     | MALT1   | NTRK1    | RARA     | STK11     |
| AKT2     | CBFB   | DICER1 | FGFR2     | HRAS      | MAP2K1  | NTRK2    | RASGEF1A | SUFU      |
| AKT3     | CBL    | DNM2   | FGFR3     | HSP90AA1  | MAP2K2  | NTRK3    | RB1      | SUZ12     |
| ALK      | CBLB   | DNMT3A | FGFR4     | ICK       | MAP2K4  | NUP93    | RECQL4   | SYK       |
| APC      | CCND1  | DOT1L  | FH        | ID3       | MAP3K1  | NUP98    | RELN     | SYNE1     |
| APH1A    | CCND2  | DTX1   | FHIT      | IDH1      | MAP3K14 | P2RY8    | RET      | TAF1      |
| AR       | CCND3  | DUSP2  | FLCN      | IDH2      | MAP3K6  | PAG1     | RHOA     | TBL1XR1   |
| ARAF     | CCNE1  | DUSP9  | FLT1      | IGF1R     | MAP3K7  | PAK3     | RHOH     | TCF3      |
| ARFRP1   | CCT6B  | EBF1   | FLT3      | IGF2      | MAPK1   | PALB2    | RICTOR   | TCL1A     |
| ARHGAP26 | CD22   | ECT2L  | FLT4      | IKBKE     | MCL1    | PASK     | RNF43    | TET2      |
| ARID1A   | CD274  | EED    | FLYWCH1   | IKZF1     | MDM2    | PAX5     | ROS1     | TGFB2     |
| ARID1B   | CD36   | EGFR   | FOXL2     | IKZF2     | MDM4    | PBRM1    | RPTOR    | TLL2      |
| ARID2    | CD58   | ELP2   | FOXO1     | IKZF3     | MED12   | PC       | RUNX1    | TMEM30A   |
| ASMTL    | CD70   | EML4   | FOXO3     | IL7R      | MEF2B   | PCBP1    | RUNX1T1  | TNFAIP3   |
| ASXL1    | CD79A  | EP300  | FOXP1     | INHBA     | MEF2C   | PCLO     | S1PR2    | TNFRSF11A |
| ATM      | CD79B  | EPHA3  | FRS2      | INPP4B    | MEN1    | PDCD11   | SDHA     | TNFRSF14  |
| ATR      | CDC73  | EPHA5  | FUBP1     | INPP5D    | MET     | PDCD1LG2 | SDHB     | TNFRSF17  |
| ATRX     | CDH1   | EPHA7  | GADD45B   | IRF1      | MIB1    | PDGFRA   | SDHC     | TOP1      |
| AURKA    | CDK12  | EPHB1  | GATA1     | IRF4      | MITF    | PDGFRB   | SDHD     | TP53      |
| AURKB    | CDK4   | ERBB2  | GATA2     | IRF8      | MKI67   | PDK1     | SERP2    | TP63      |
| AXIN1    | CDK6   | ERBB3  | GATA3     | IRS2      | MLH1    | PHF6     | SETBP1   | TRAF2     |
| AXL      | CDK8   | ERBB4  | GID4      | JAK1      | MPL     | PIGA     | SETD2    | TRAF3     |
| B2M      | CDKN1B | ERG    | GNA11     | JAK2      | MRE11A  | PIK3C2B  | SF3B1    | TRAF5     |
| BAP1     | CDKN2A | ESR1   | GNA12     | JAK3      | MSH2    | PIK3CA   | SGK1     | TRAF7     |
| BARD1    | CDKN2B | ETS1   | GNA13     | JARID2    | MSH3    | PIK3CB   | SMAD2    | TSC1      |
| BCL10    | CDKN2C | ETV6   | GNAQ      | JUN       | MSH6    | PIK3CG   | SMAD4    | TSC2      |
| BCL11B   | CEBPA  | EXOSC6 | GNAS      | KAT6A     | MTOR    | PIK3R1   | SMARCA1  | TSHR      |
| BCL2     | CHD2   | EZH2   | GPR124    | KDM2B     | MUTYH   | PIK3R2   | SMARCA4  | TUSC3     |
| BCL2L1   | CHEK1  | FAF1   | GRIN2A    | KDM4C     | MYC     | PIM1     | SMARCB1  | TYK2      |
| BCL2L2   | CHEK2  | FAM46C | GSK3B     | KDM5A     | MYCL1   | PLCG2    | SMC1A    | U2AF1     |
| BCL6     | CIC    | FANCA  | GTSE1     | KDM5C     | MYCN    | PML      | SMC3     | U2AF2     |
| BCL7A    | CIITA  | FANCC  | H3F3A     | KDM6A     | MYD88   | PMS2     | SMO      | VHL       |
| BCOR     | CKS1B  | FANCD2 | HDAC1     | KDR       | MYO18A  | POT1     | SOCS1    | WDR90     |
| BCORL1   | CPS1   | FANCE  | HDAC4     | KEAP1     | NCOR2   | PPP2R1A  | SOCS2    | WHSC1     |
| BCR      | CREBBP | FANCF  | HDAC7     | KIT       | NCSTN   | PRDM1    | SOCS3    | WISP3     |
| BIRC3    | CRKL   | FANCG  | HGF       | KLF4      | NF1     | PRKAR1A  | SOX10    | WT1       |
| BLM      | CRLF2  | FANCL  | HIST1H1C  | KLHL6     | NF2     | PRKDC    | SOX2     | XBP1      |
| BRAF     | CSF1R  | FAS    | HIST1H1D  | KMT2A     | NFE2L2  | PRSS8    | SOX9     | XPO1      |
| BRCA1    | CSF3R  | FBXO11 | HIST1H1E  | KMT2B     | NFKBIA  | PTCH1    | SPEN     | YY1AP1    |
| BRCA2    | CTCF   | FBXO31 | HIST1H2AC | KMT2D     | NKX2-1  | PTEN     | SPOP     | ZMYM3     |
| BRD4     | CTNNA1 | FBXW7  | HIST1H2AG | KRAS      | NLRP1   | PTPN11   | SRC      | ZNF217    |
| BRIP1    | CTNNB1 | FGF10  | HIST1H2AL | LEF1      | NOD1    | PTPN2    | SRSF2    | ZNF24     |
| BRSK1    | CUX1   | FGF14  | HIST1H2AM | LMO1      | NOTCH1  | PTPN6    | STAG2    | ZNF703    |
| BTG2     | CXCR4  | FGF19  | HIST1H2BC | LRP1B     | NOTCH2  | PTPRO    | STAT3    | ZRSR2     |
