# Supplementary material for: Management and Molecular Characterization of Intraventricular Glioblastoma: A Single-Institution Case Series
Source: MDPI journal article supplement (doi:10.3390/ijms241713285), 2023-08-27
Supplement: s1 [file s1]

**Supplementary Table S2. Complete Genetic Mutation Profile of Two Patients**

| Patient 6   |                   |                          |                       |                              |
|-------------|-------------------|--------------------------|-----------------------|------------------------------|
| Gene        | Amino Acid Change | Variant Allele Frequency | Copy Number Variation | Mutation Status              |
| ATM         | p.F1463C          | 54.86                    |                       | Benign/Likely Benign         |
| NF1         | p.Y1659fs         | 32.57                    |                       | Pathogenic/Likely Pathogenic |
| PMS2        | p.A572V           | 61.42                    |                       | VUS                          |
| PTEN        | p.N292fs          | 62.4                     |                       | Pathogenic/Likely Pathogenic |
| TSC2        | p.P768S           | 54.8                     |                       | VUS                          |
| BCOR        | p.E1093K          | 43.9                     |                       | VUS                          |
| CARD11      | p.V429I           | 24.48                    |                       | VUS                          |
| FBXO11      | p.E234K           | 48.18                    |                       | VUS                          |
| KDR         | p.R1022*          | 39.5                     |                       | VUS                          |
| EGFR        |                   |                          | Amplified             | Pathogenic/Likely Pathogenic |
| Patient 8   |                   |                          |                       |                              |
| Gene        | Amino Acid Change | Variant Allele Frequency | Copy Number Variation | Mutation Status              |
| BRCA2       | p.D2237V          | 73.59                    |                       | VUS                          |
| PTEN        | p.C124Y           | 45.89                    |                       | Pathogenic/Likely Pathogenic |
| RB1         | p.L662R           | 43.51                    |                       | VUS                          |
| TERT        | c.-146C>T         | 35.02                    |                       | Pathogenic/Likely Pathogenic |
| EPHB1       | p.S774L           | 43.23                    |                       | VUS                          |
| FANCE       | p.Q182fs          | 29.7                     |                       | VUS                          |
| KDM5A       | p.I1226V          | 52.77                    |                       | VUS                          |
| PCLO        | p.R3540W          | 22.31                    |                       | VUS                          |
| SETD2       | p.A2451V          | 47.14                    |                       | VUS                          |
| WDR90       | p.R784Q           | 45.61                    |                       | VUS                          |
| *Stop Codon |                   |                          |                       |                              |
